# Supplementary material
Source: Royal Society of Chemistry journal article supplement (doi:10.1039/d6ta01120a)
Supplement: d6ta01120a1.pdf [file d6ta01120a1.pdf]

## Supplementary information

# Unified effects of lanthanoid elements and magnetic fields on the electrocatalytic CO<sub>2</sub> reduction reaction

Shilin Wei, Weiqi Liu and Lang Xu\*

*MOE Key Laboratory of Coal Processing and Efficient Utilization, School of Chemical Engineering and Technology, China University of Mining and Technology, 1 Daxue Road, Xuzhou, Jiangsu, 221116, China*

\*Corresponding author. *E-mail address: lang.xu@cumt.edu.cn* (L. Xu)

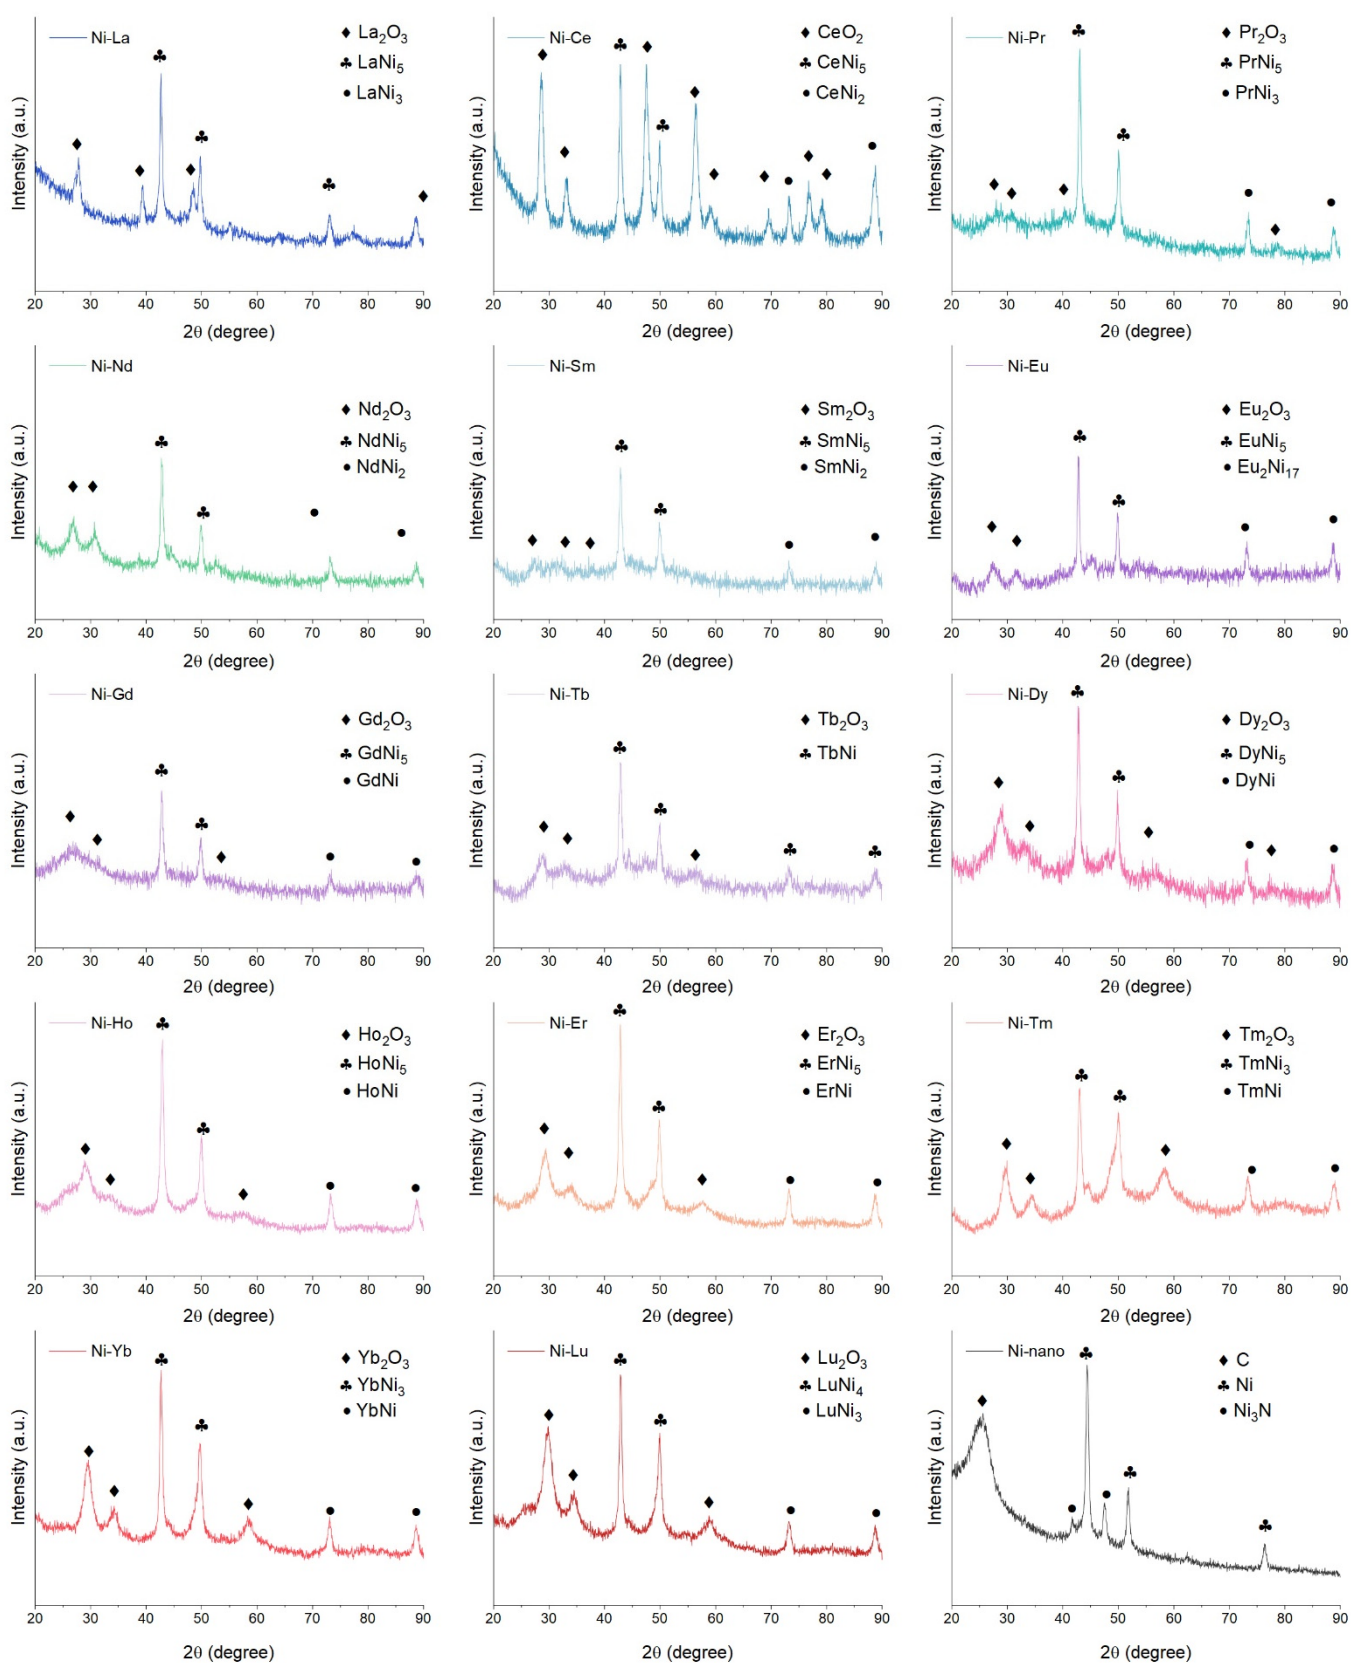

Fig. S1 XRD patterns of Ni-Ln and Ni-nano catalysts.

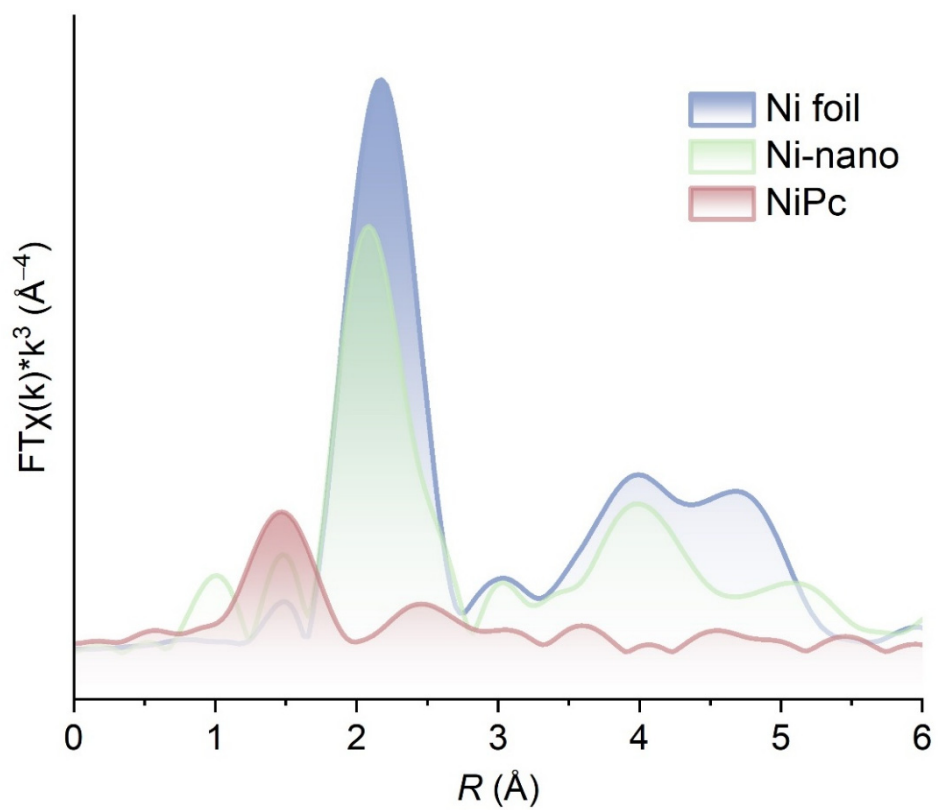

**Fig. S2** Fourier-transformed Ni K-edge EXAFS spectra of Ni foil, NiPc, and Ni-nano in R-space.

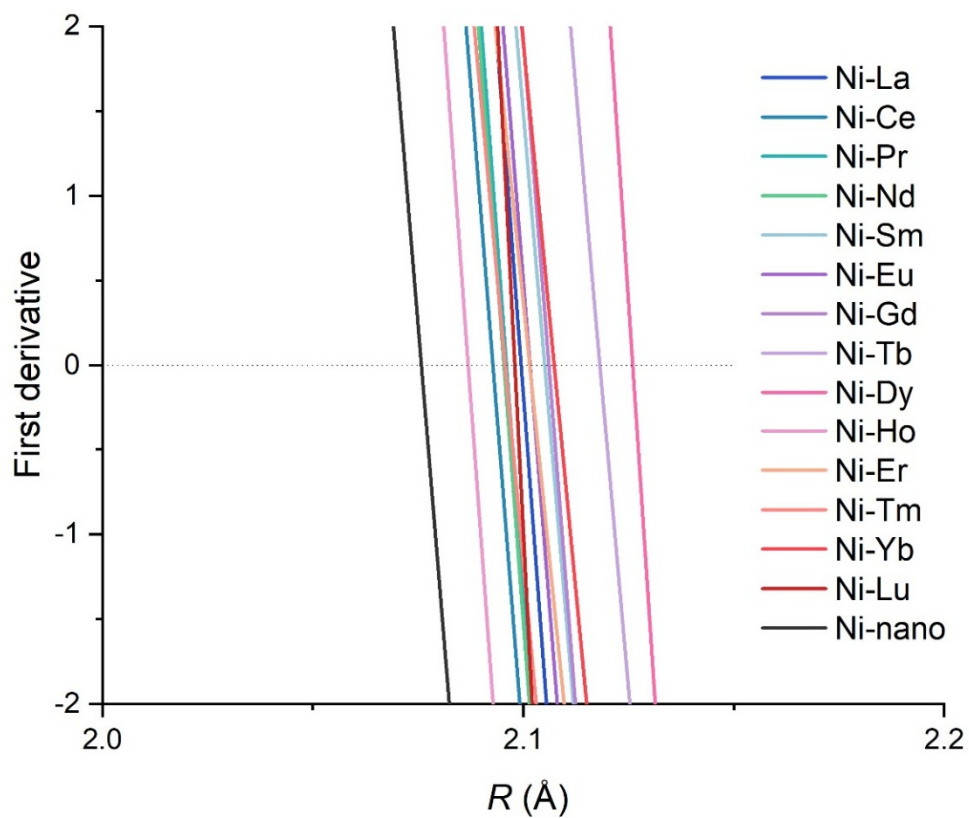

**Fig. S3** First derivative of the R-space EXAFS spectra shown in Fig. 3a.

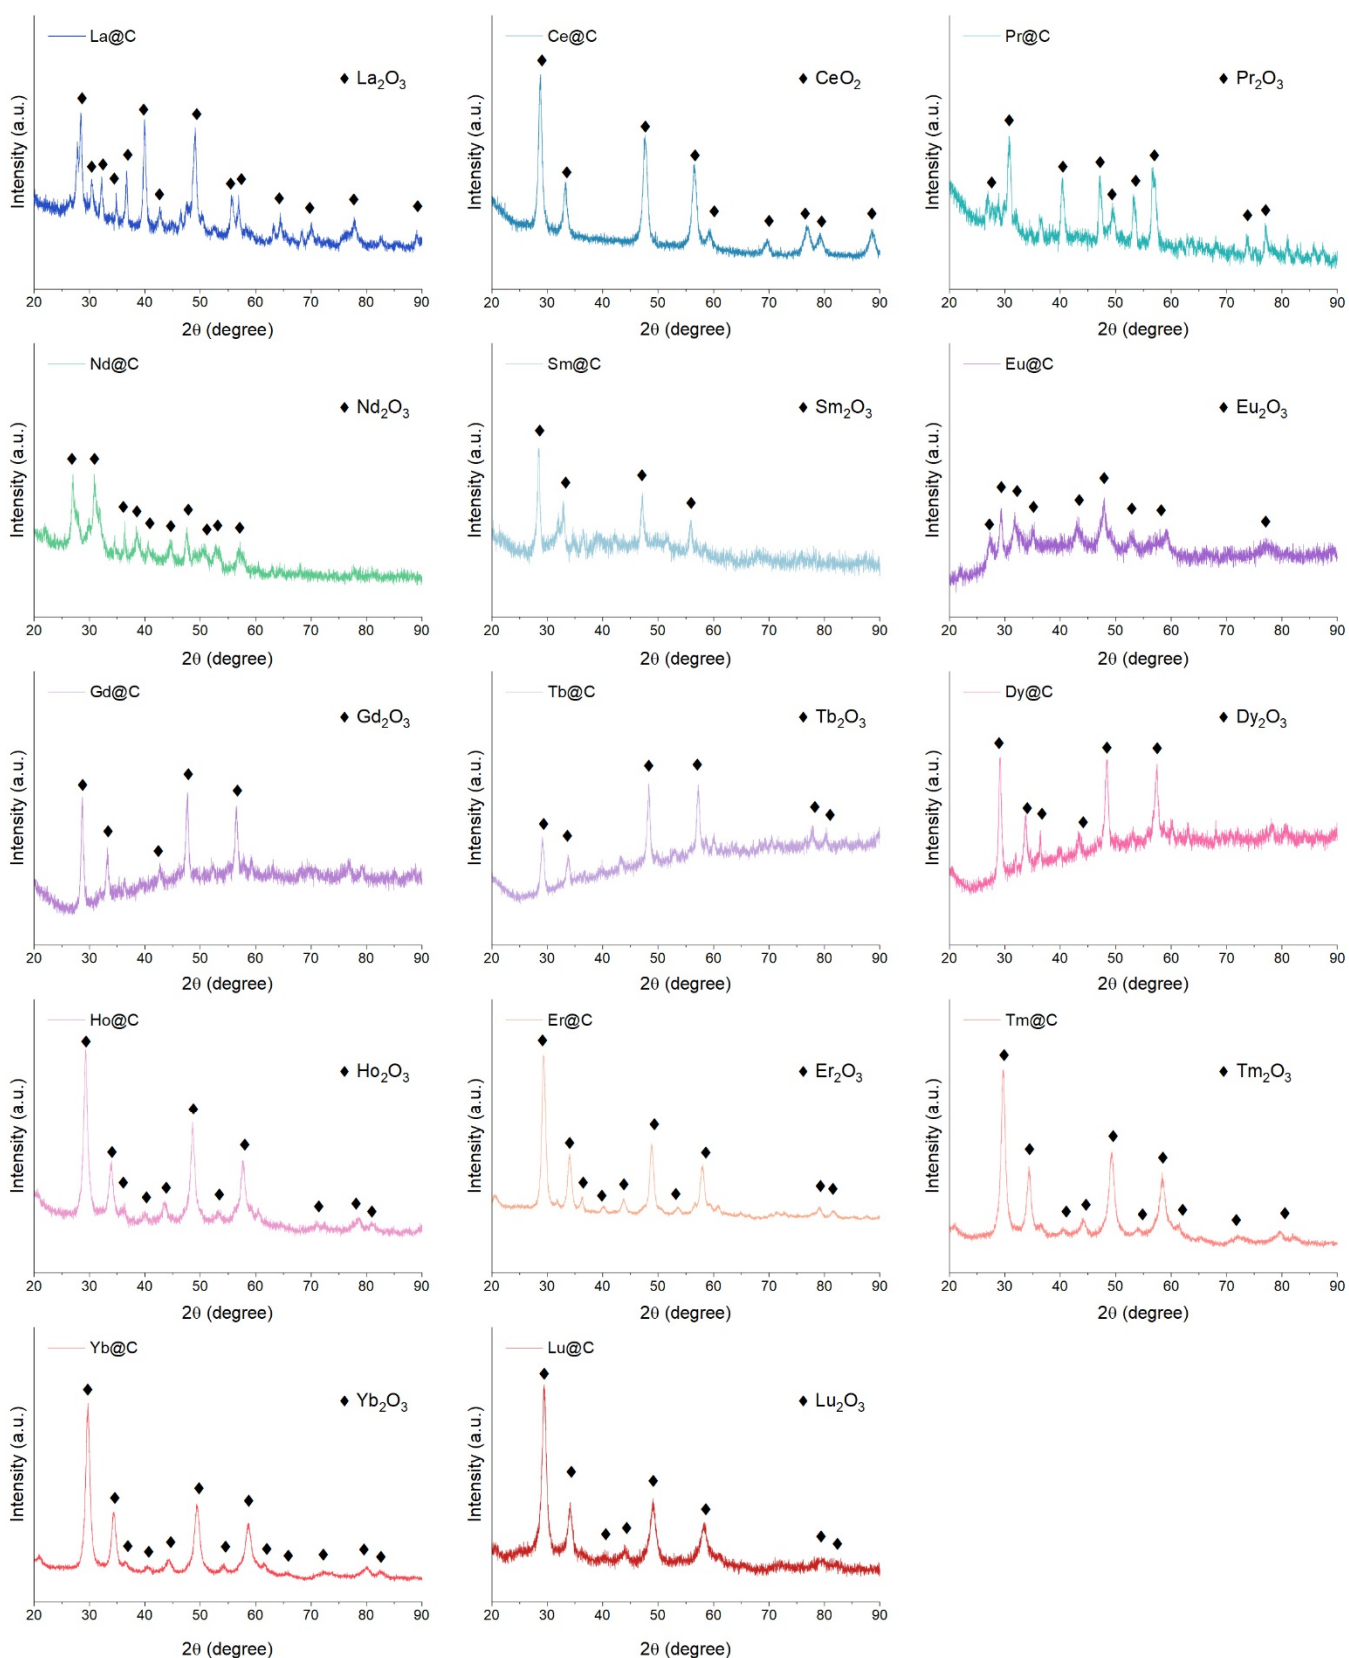

Fig. S4 XRD patterns of Ln@C control samples.

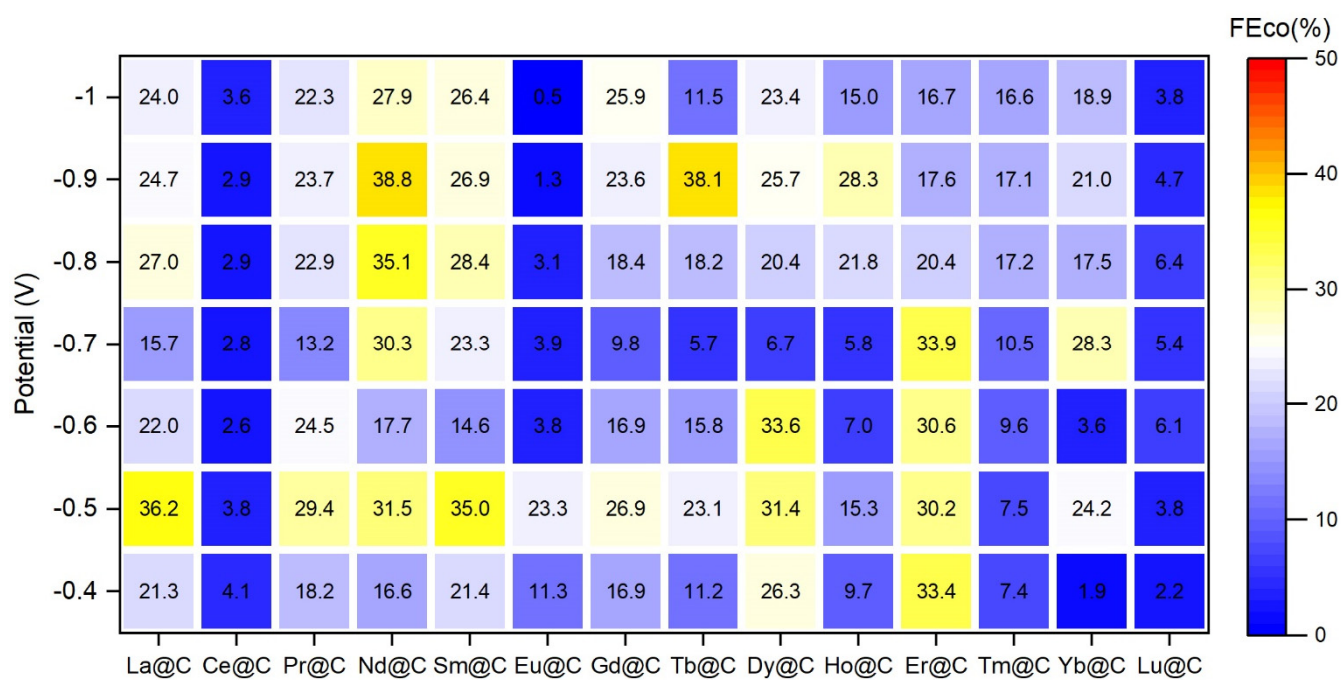

**Fig. S5** FE<sub>CO</sub> of Ln@C control samples at different applied potentials.

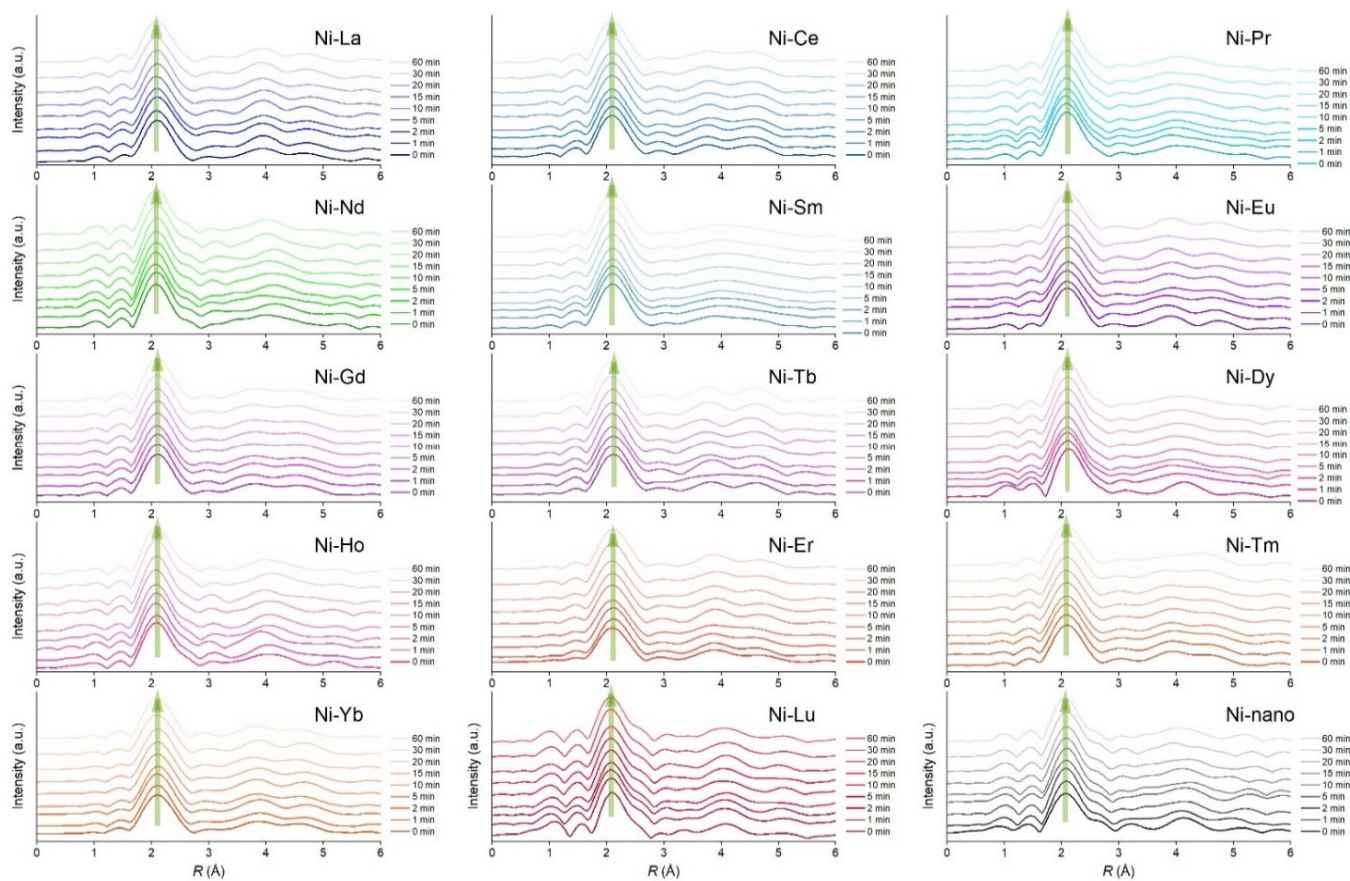

**Fig. S6** Fourier-transformed Ni K-edge EXAFS spectra of Ni-Ln and Ni-nano in R-space, measured in situ at  $-0.8$  V vs. RHE during the eCO<sub>2</sub>RR.

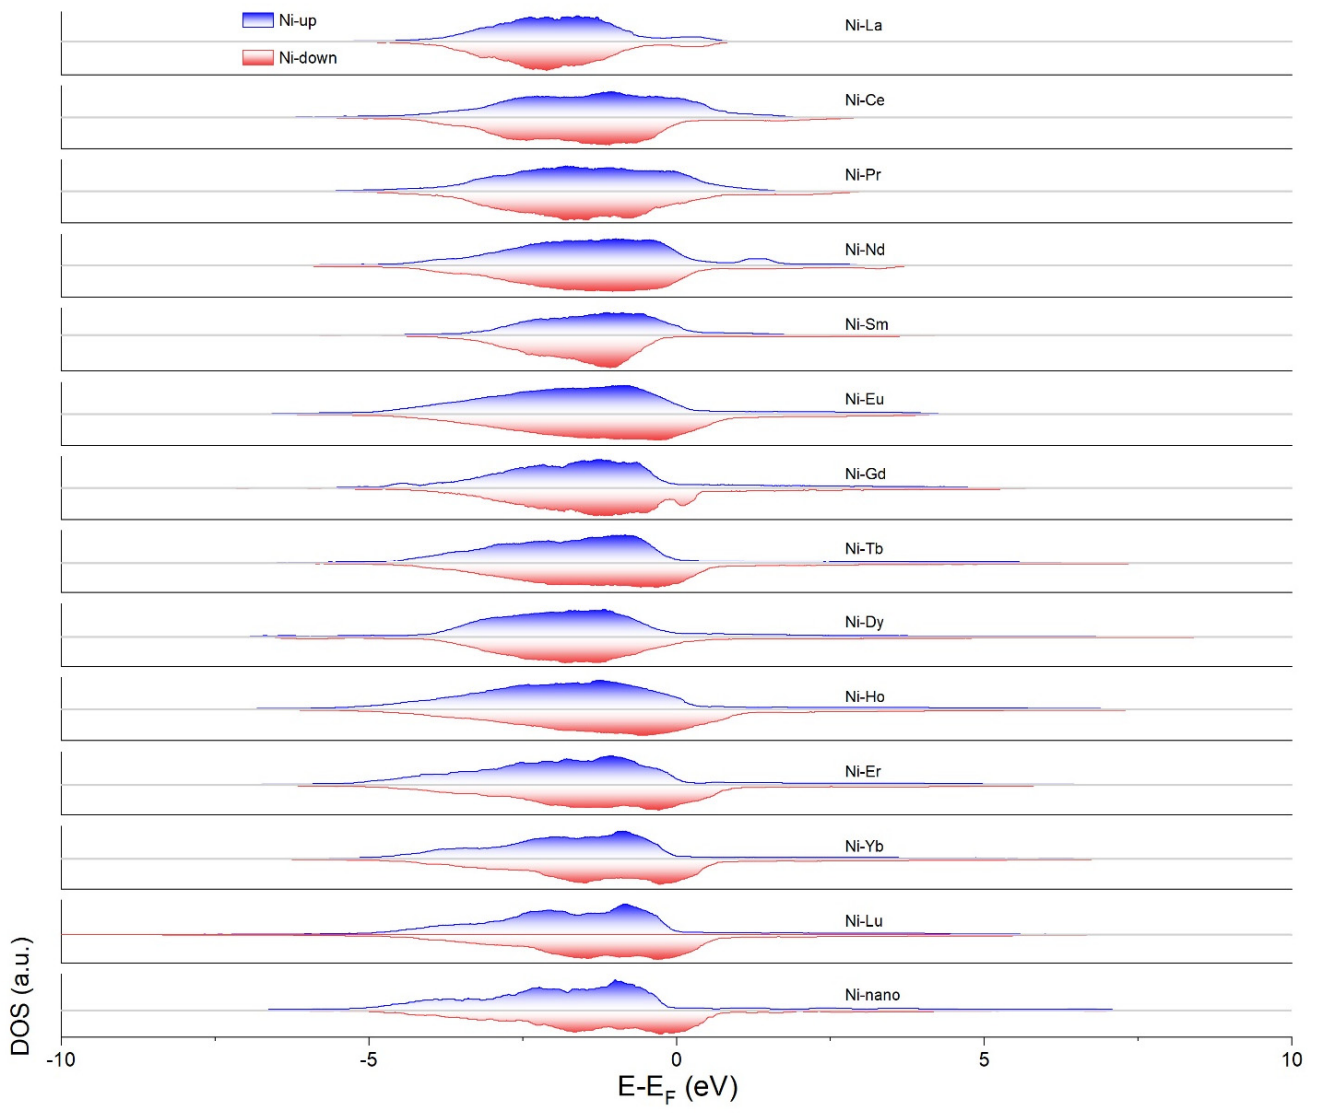

**Fig. S7** DOS of Ni atoms in Ni-Ln and Ni-nano.

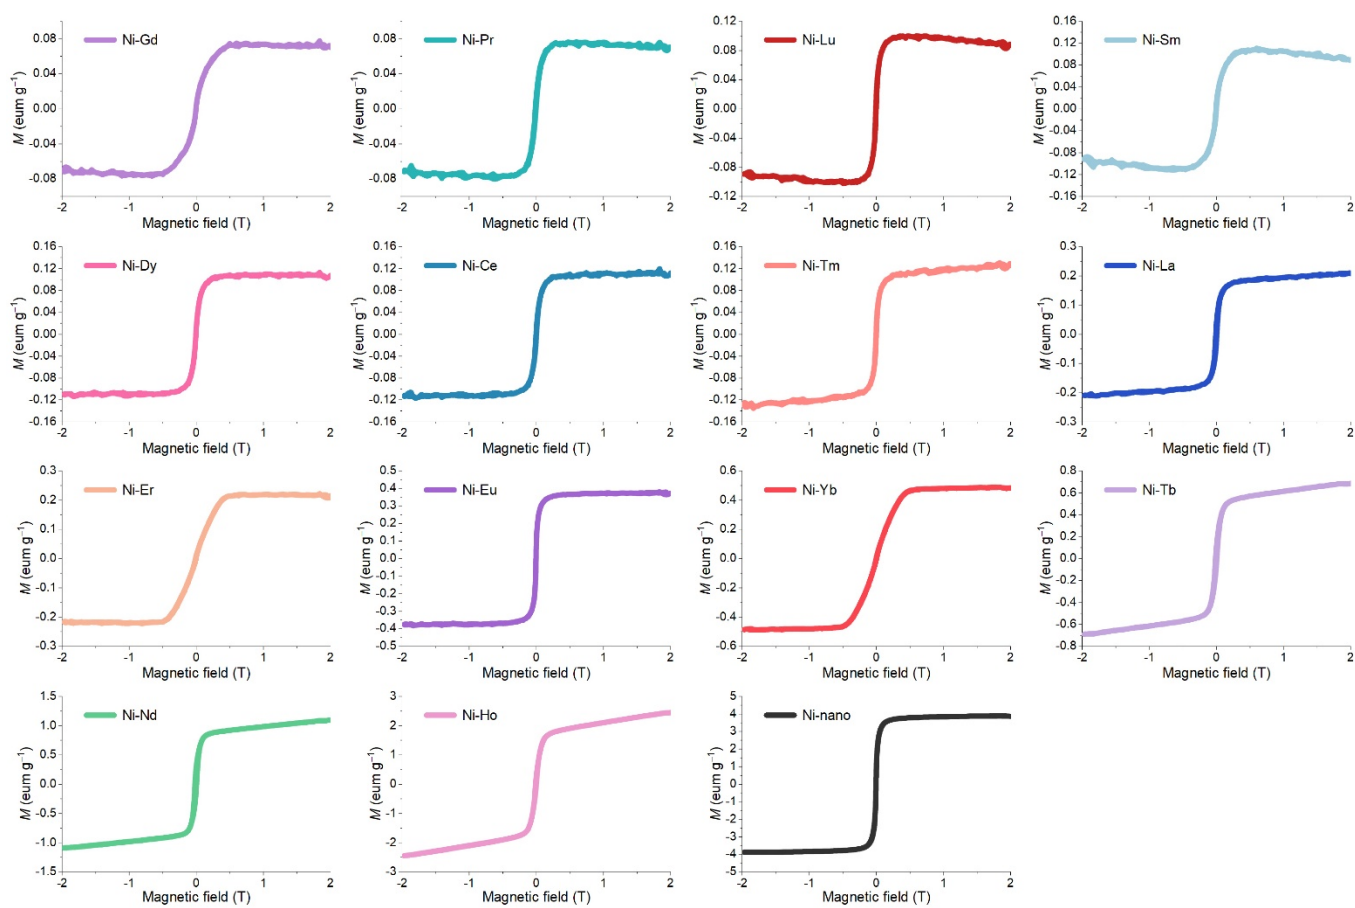

**Fig. S8** Complete magnetic hysteresis loops of Ni-Ln and Ni-nano.

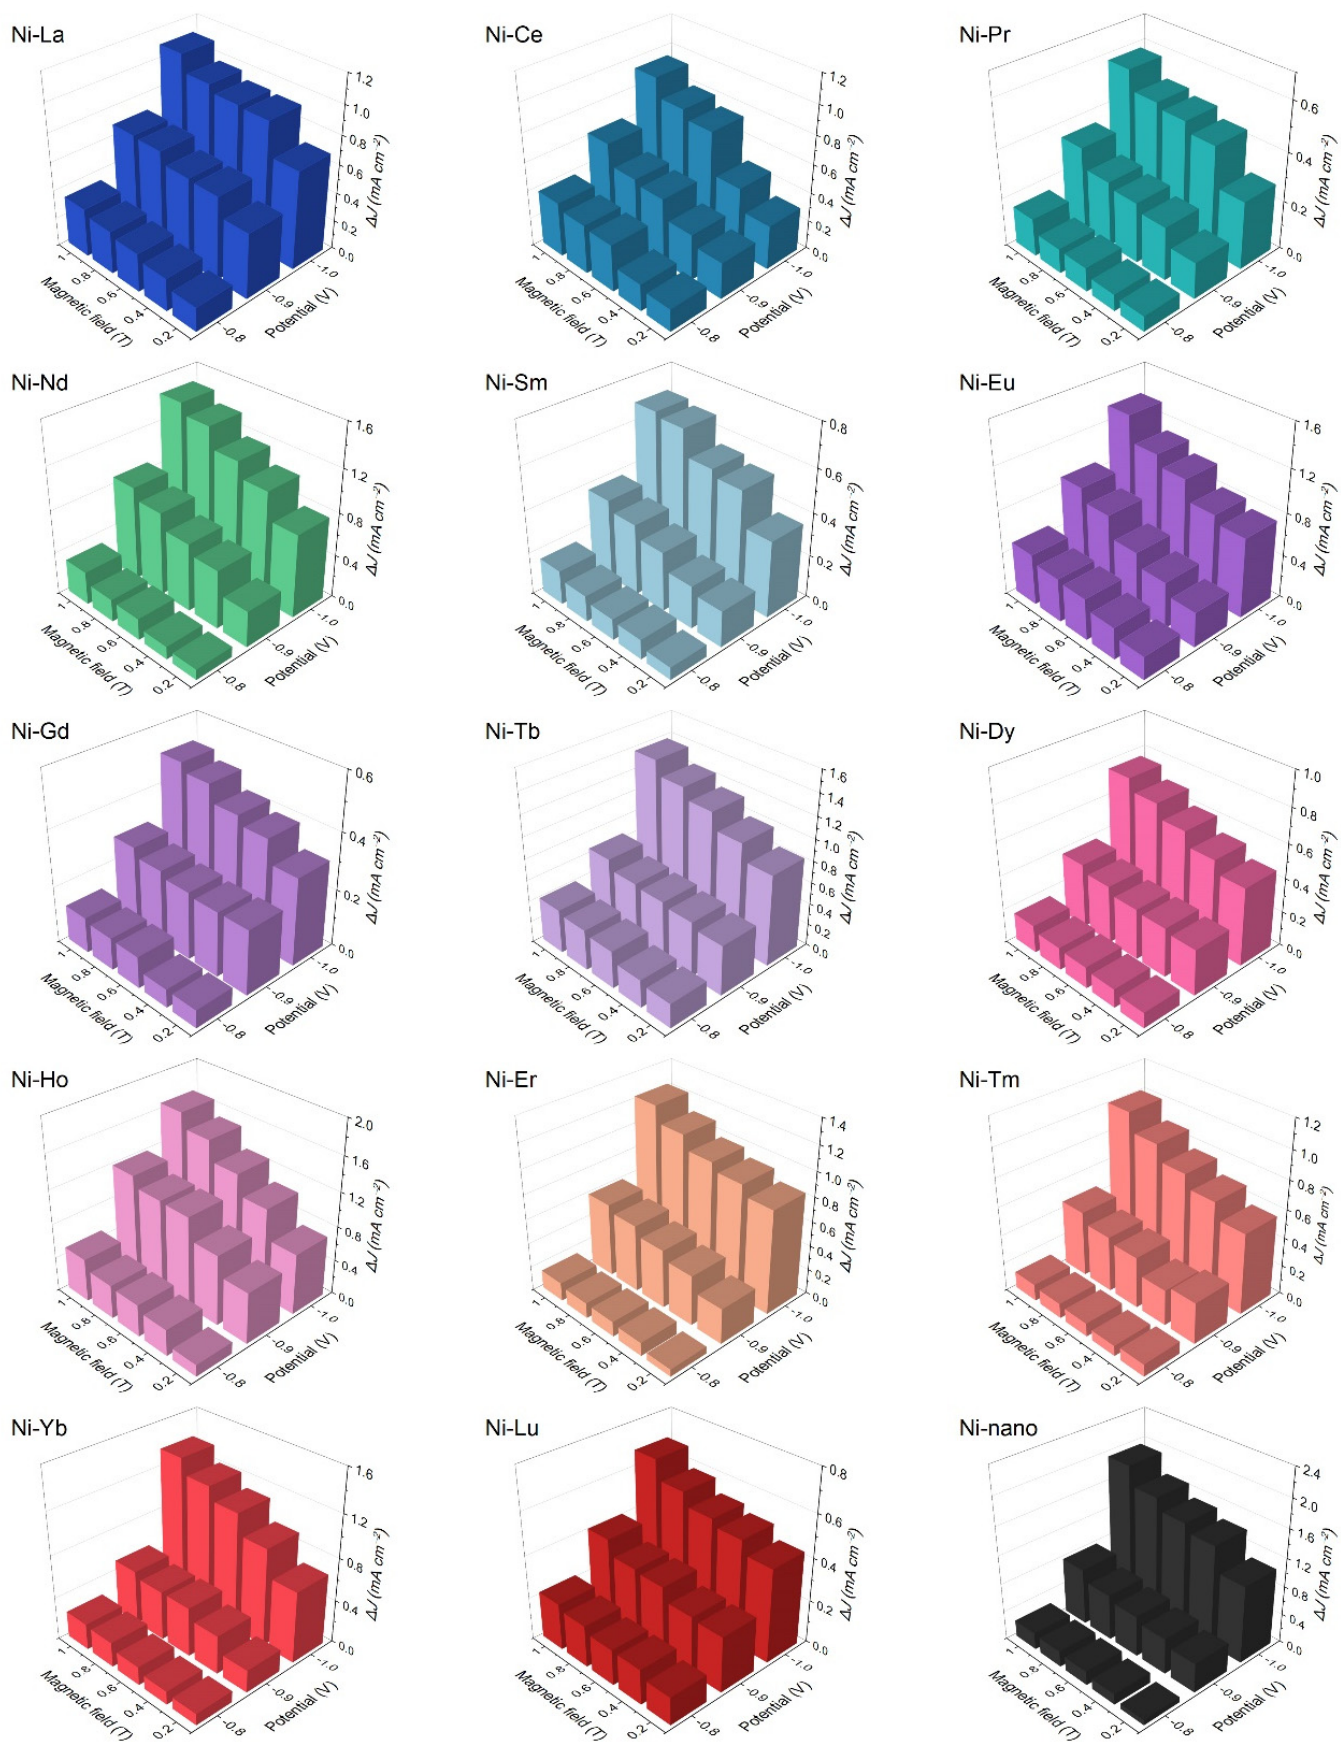

**Fig. S9**  $\Delta J$  of all Ni-Ln catalysts and Ni-nano under all combinations of applied potential and magnetic field strength tested in this study.

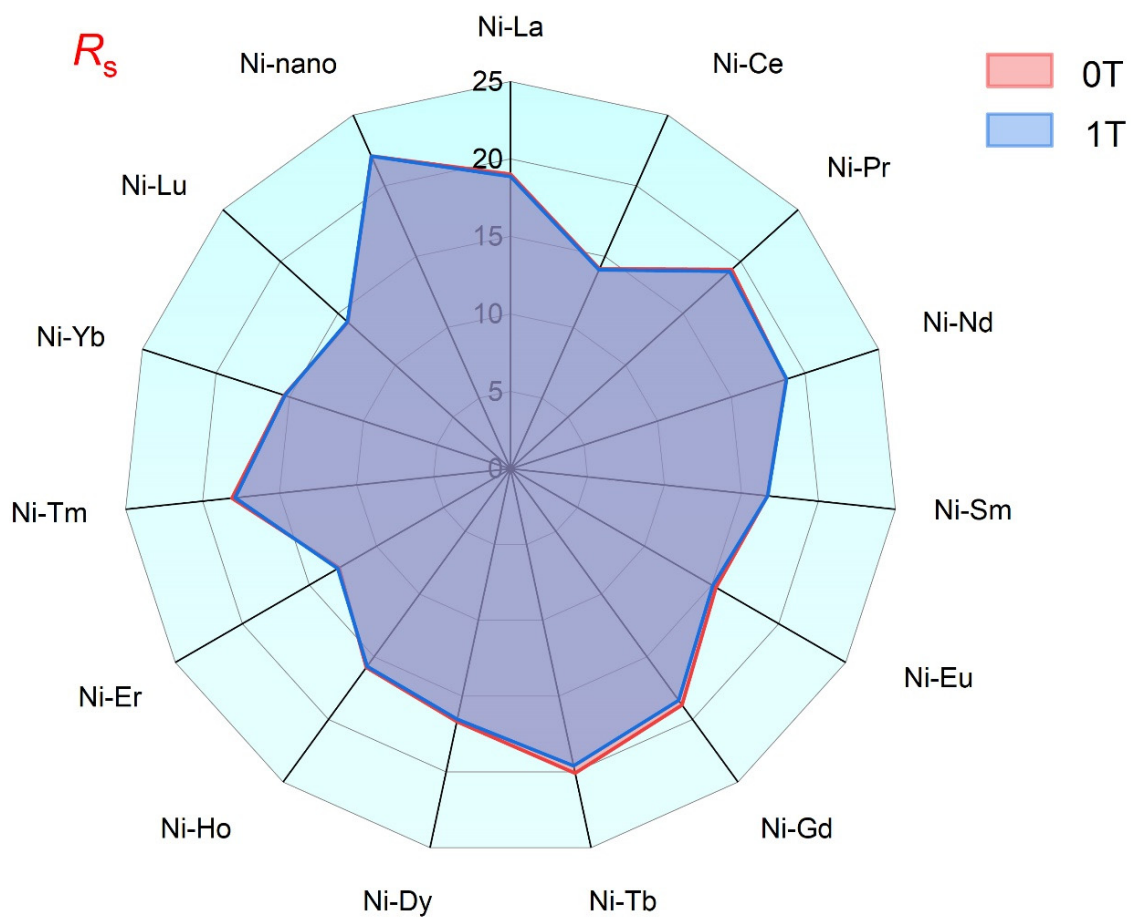

**Fig. S10** Fitted values of electrolyte resistance ( $R_s$ ) at 0 T and 1 T magnetic fields for Ni-Ln and Ni-nano. All  $R_s$  values are given in  $\Omega$ .

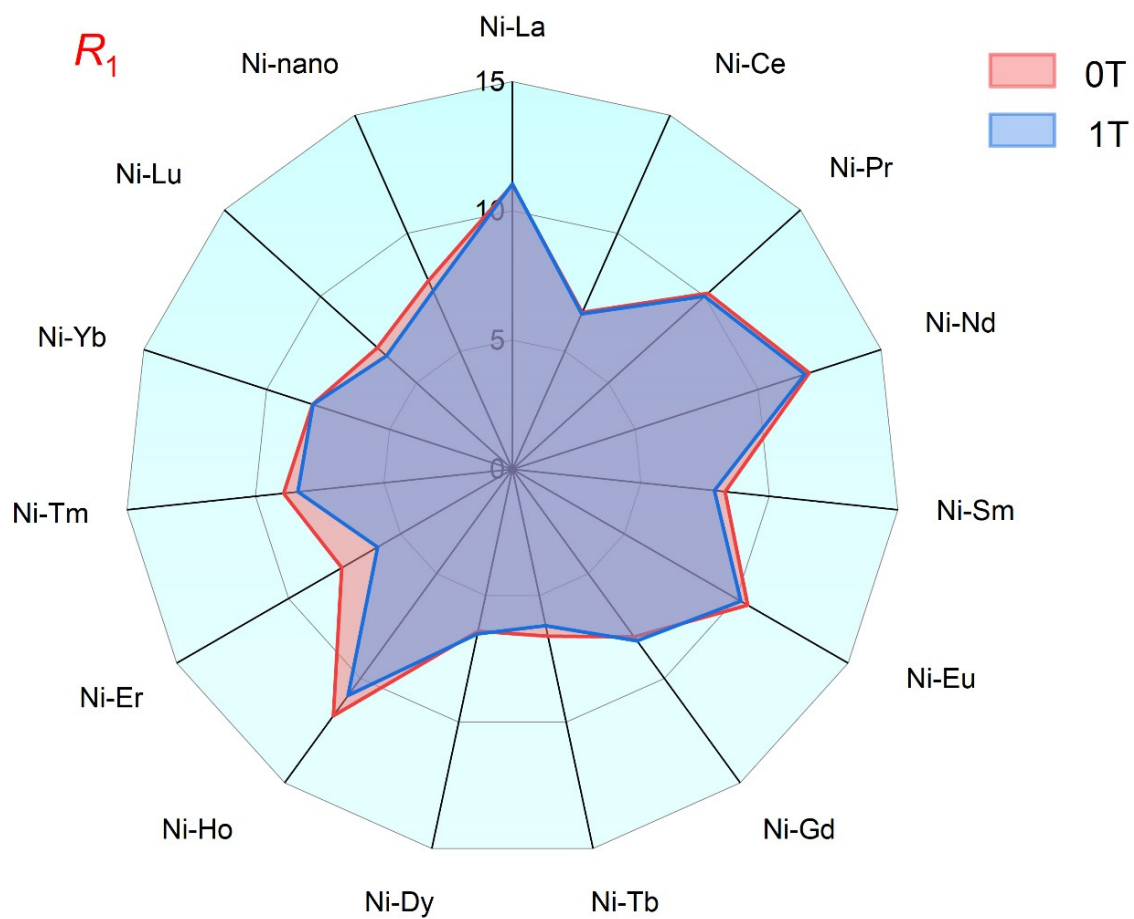

**Fig. S11** Fitted values of catalyst-film resistance ( $R_1$ ) at 0 T and 1 T magnetic fields for Ni-Ln and Ni-nano. All  $R_1$  values are given in  $\Omega$ .

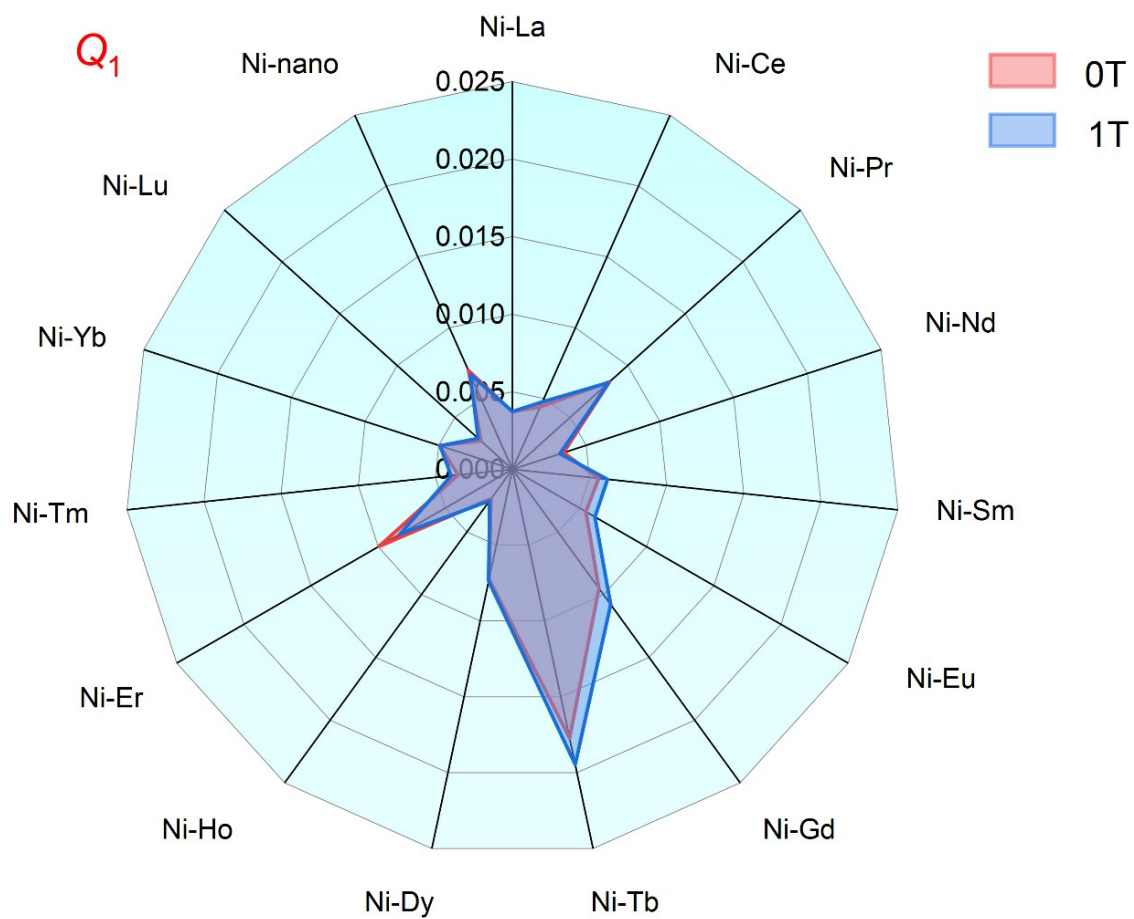

**Fig. S12** Fitted values of the constant phase element  $Q_1$ , representing the catalyst-layer capacitance, at 0 T and 1 T magnetic fields for Ni-Ln and Ni-nano. All  $Q_1$  values are given in  $\Omega^{-1} \text{ s}^n$ .

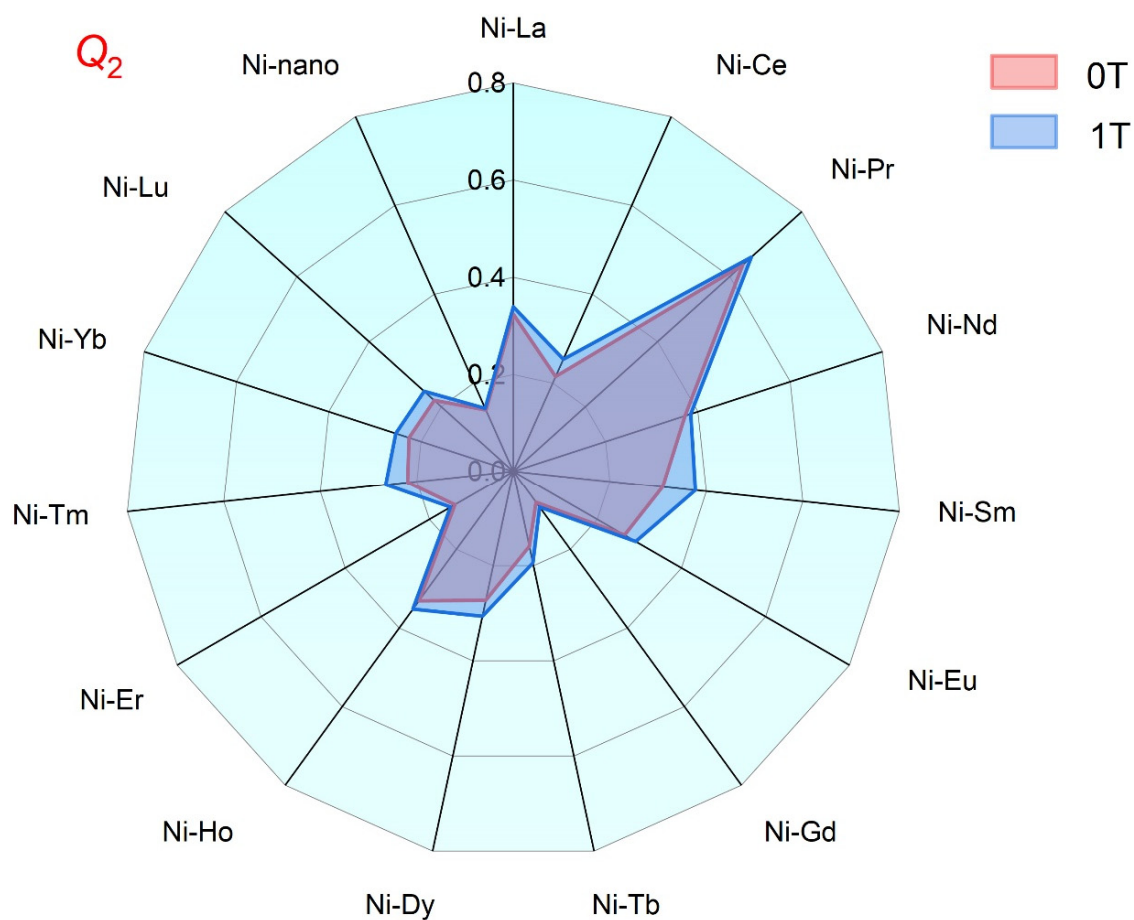

**Fig. S13** Fitted values of the constant phase element  $Q_2$ , representing the double-layer capacitance, at 0 T and 1 T magnetic fields for Ni-Ln and Ni-nano. All  $Q_2$  values are given in  $\Omega^{-1} s^n$ .

**Table S1.** Absorption edge energy difference ( $\Delta E$ ) between the Ni K-edge XANES spectra of Ni-Ln and Ni-nano.

| Sample | $\Delta E$ (eV) <sup>[a]</sup> |
|--------|--------------------------------|
| Ni-La  | 0.80                           |
| Ni-Ce  | 0.71                           |
| Ni-Pr  | 0.77                           |
| Ni-Nd  | 1.20                           |
| Ni-Sm  | 0.50                           |
| Ni-Eu  | 0.33                           |
| Ni-Gd  | 1.00                           |
| Ni-Tb  | 0.51                           |
| Ni-Dy  | 1.06                           |
| Ni-Ho  | 0.65                           |
| Ni-Er  | 1.73                           |
| Ni-Tm  | 0.26                           |
| Ni-Yb  | 0.36                           |
| Ni-Lu  | 1.94                           |

[a]  $\Delta E = E(\text{Ni-Ln}) - E(\text{Ni-nano})$ .

**Table S2.** CO<sub>2</sub> adsorption energies ( $E_{\text{ads}}$ ) of Ni-Ln and Ni-nano.

---

| <b>Sample</b> | <b><math>E_{\text{ads}}</math> (eV)</b> |
|---------------|-----------------------------------------|
| Ni-La         | -1.16                                   |
| Ni-Ce         | -1.26                                   |
| Ni-Pr         | -1.23                                   |
| Ni-Nd         | -1.33                                   |
| Ni-Sm         | -0.85                                   |
| Ni-Eu         | -1.08                                   |
| Ni-Gd         | -1.10                                   |
| Ni-Tb         | -1.34                                   |
| Ni-Dy         | -0.77                                   |
| Ni-Ho         | -0.49                                   |
| Ni-Er         | -1.13                                   |
| Ni-Tm         | -0.76                                   |
| Ni-Yb         | -0.85                                   |
| Ni-Lu         | -0.93                                   |
| Ni-nano       | 0.14                                    |

---

**Table S3.** Optimal potential, peak CO faradaic efficiency (FE<sub>CO</sub>), and free energy barriers ( $\Delta G_1$  and  $\Delta G_2$ ) for Ni-Ln and Ni-nano.

| Sample | Optimal potential (V) | Peak FE <sub>CO</sub> (%) | $\Delta G_1$ (eV) | $\Delta G_2$ (eV) |
|--------|-----------------------|---------------------------|-------------------|-------------------|
| Ni-La  | -0.6                  | 96.6                      | -0.34             | 0.00              |
| Ni-Ce  | -0.6                  | 98.2                      | -0.38             | -0.19             |
| Ni-Pr  | -0.5                  | 93.3                      | -0.43             | 0.13              |
| Ni-Nd  | -0.6                  | 93.0                      | -0.65             | 0.09              |
| Ni-Sm  | -0.6                  | 97.4                      | -0.15             | -0.36             |
| Ni-Eu  | -0.6                  | 93.9                      | -0.32             | 0.17              |
| Ni-Gd  | -0.6                  | 97.8                      | -0.24             | -0.10             |
| Ni-Tb  | -0.6                  | 94.7                      | -0.45             | 0.10              |
| Ni-Dy  | -0.5                  | 94.3                      | 0.09              | -0.43             |
| Ni-Ho  | -0.6                  | 97.5                      | -0.10             | -0.28             |
| Ni-Er  | -0.7                  | 98.4                      | 0.02              | -0.07             |
| Ni-Tm  | -0.7                  | 98.4                      | -0.02             | -0.18             |
| Ni-Yb  | -0.7                  | 95.9                      | 0.02              | -0.35             |
| Ni-Lu  | -0.6                  | 97.8                      | -0.19             | -0.10             |

**Table S4.** Saturation magnetization ( $M$ ) of Ni-Ln and Ni-nano.

---

| <b>Sample</b> | <b><math>M</math> (emu g<sup>-1</sup>)</b> |
|---------------|--------------------------------------------|
| Ni-La         | 0.187                                      |
| Ni-Ce         | 0.110                                      |
| Ni-Pr         | 0.076                                      |
| Ni-Nd         | 0.920                                      |
| Ni-Sm         | 0.108                                      |
| Ni-Eu         | 0.360                                      |
| Ni-Gd         | 0.074                                      |
| Ni-Tb         | 0.570                                      |
| Ni-Dy         | 0.108                                      |
| Ni-Ho         | 1.900                                      |
| Ni-Er         | 0.210                                      |
| Ni-Tm         | 0.111                                      |
| Ni-Yb         | 0.460                                      |
| Ni-Lu         | 0.099                                      |
| Ni-nano       | 3.780                                      |

---

**Table S5.** Charge-transfer resistance ( $R_{ct}$ ) of Ni-Ln and Ni-nano in the absence of a magnetic field (0 T).

| Sample  | $R_{ct}$ ( $\Omega$ ) | $\Delta R_{ct}$ (%) <sup>[a]</sup> |
|---------|-----------------------|------------------------------------|
| Ni-nano | 24.6                  | 0                                  |
| Ni-La   | 12.1                  | -50.8                              |
| Ni-Ce   | 10.4                  | -57.7                              |
| Ni-Pr   | 12.4                  | -49.6                              |
| Ni-Nd   | 13.5                  | -45.1                              |
| Ni-Sm   | 11.8                  | -52.0                              |
| Ni-Eu   | 12.6                  | -48.8                              |
| Ni-Gd   | 19.0                  | -22.8                              |
| Ni-Tb   | 16.0                  | -35.0                              |
| Ni-Dy   | 10.3                  | -58.1                              |
| Ni-Ho   | 11.2                  | -54.5                              |
| Ni-Er   | 16.2                  | -34.1                              |
| Ni-Tm   | 13.2                  | -46.3                              |
| Ni-Yb   | 11.5                  | -53.3                              |
| Ni-Lu   | 11.4                  | -53.7                              |

[a] Percentage change in  $R_{ct}$  for each Ni-Ln catalyst relative to Ni-nano:  $\Delta R_{ct} = (R_{ct} - 24.6) / 24.6 \times 100\%$ .

**Table S6.** Charge-transfer resistance ( $R_{ct}$ ) of Ni-Ln and Ni-nano at 0 T and 1 T magnetic fields.

| Sample  | $R_{ct}$ ( $\Omega$ ) <sup>[a]</sup> | $R_{ct-magnet}$ ( $\Omega$ ) <sup>[b]</sup> | $\Delta R_{ct-magnet}$ (%) <sup>[c]</sup> |
|---------|--------------------------------------|---------------------------------------------|-------------------------------------------|
| Ni-nano | 24.6                                 | 19.9                                        | -19.1                                     |
| Ni-La   | 12.1                                 | 10.9                                        | -9.9                                      |
| Ni-Ce   | 10.4                                 | 7.9                                         | -24.0                                     |
| Ni-Pr   | 12.4                                 | 10.1                                        | -18.5                                     |
| Ni-Nd   | 13.5                                 | 11.1                                        | -17.8                                     |
| Ni-Sm   | 11.8                                 | 8.5                                         | -28.0                                     |
| Ni-Eu   | 12.6                                 | 10.7                                        | -15.1                                     |
| Ni-Gd   | 19.0                                 | 15.6                                        | -17.9                                     |
| Ni-Tb   | 16.0                                 | 13.1                                        | -18.1                                     |
| Ni-Dy   | 10.3                                 | 7.7                                         | -25.2                                     |
| Ni-Ho   | 11.2                                 | 8.7                                         | -22.3                                     |
| Ni-Er   | 16.2                                 | 12.6                                        | -22.2                                     |
| Ni-Tm   | 13.2                                 | 9.7                                         | -26.5                                     |
| Ni-Yb   | 11.5                                 | 9.9                                         | -13.9                                     |
| Ni-Lu   | 11.4                                 | 8.6                                         | -24.6                                     |

[a]  $R_{ct}$  measured in the absence of a magnetic field (0 T). [b]  $R_{ct}$  measured under a 1 T magnetic field. [c]

Percentage change in  $R_{ct}$  induced by the magnetic field:  $\Delta R_{ct-magnet} = (R_{ct-magnet} - R_{ct}) / R_{ct} \times 100\%$ .
